# Supplementary material for: It's not just noise: The consequences of inequitable noise for urban wildlife
Source: Research Square preprint supplement (doi:10.21203/rs.3.rs-2753779/v1), 2023-04-06
Supplement: Supplementary file 1 [file 35b69c63ffb18c734f8f04b4.docx]

**Supporting Information for**

It’s not *just* noise: The consequences of inequitable noise for urban wildlife.

Author list: Jasmine R. Nelson-Olivieri1,a, Tamara J. Layden1,a, Edder Antunez1, Ali Khalighifar1,

Monica Lasky1, Theresa M. Laverty2,3, Karina A. Sanchez4, Graeme Shannon5, Steven Starr1, Anahita K. Verahrami1, Sara P. Bombaci1

1. Department of Fish, Wildlife, and Conservation Biology, Colorado State University, Fort Collins, CO 80523
2. Department of Ecology and Evolution, University of Chicago, Chicago, IL 60637
3. Department of Fish, Wildlife, and Conservation Ecology, New Mexico State University, Las Cruces, NM 88003
4. Department of Natural Resources and the Environment, University of New Hampshire, Durham

NH 03824

1. School of Natural Sciences, Bangor University, Bangor LL57 2UW, UK

aJ.R.N.-O and T.J.L contributed equally to this work.

***Corresponding Author:** Jasmine R. Nelson-Olivieri

**Email:** Jazz.Nelson@colostate.edu

**This PDF file includes:**

Supporting text

Figure S1

Tables S1 to S3

**
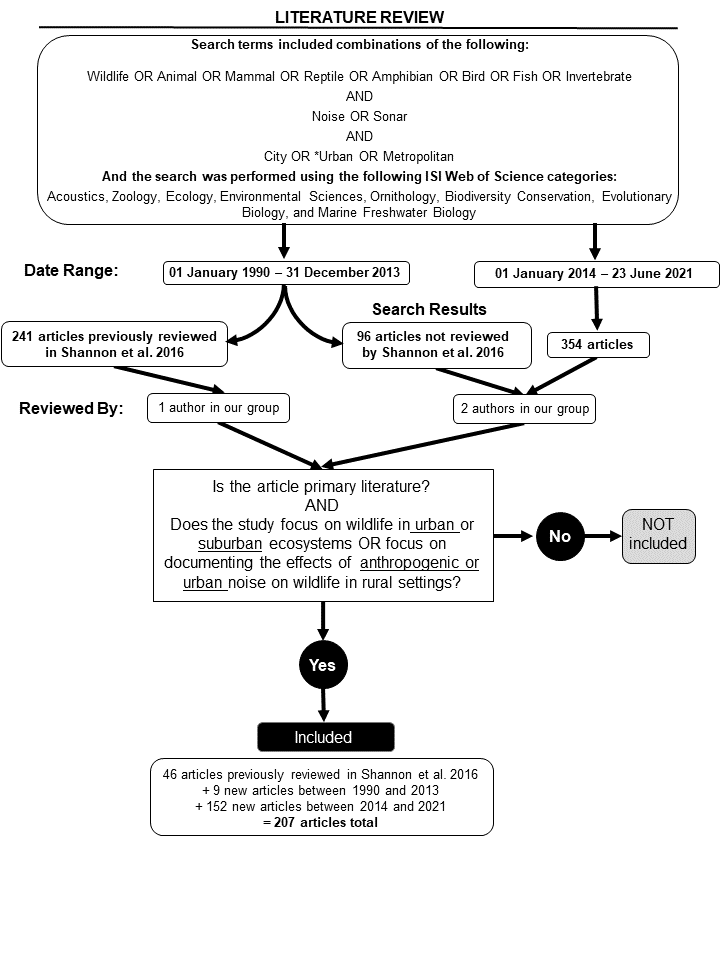
**

**Fig. S1.** A PRISMA flowchart demonstrating the methodology used to select and assess papers for the systematic literature review conducted.


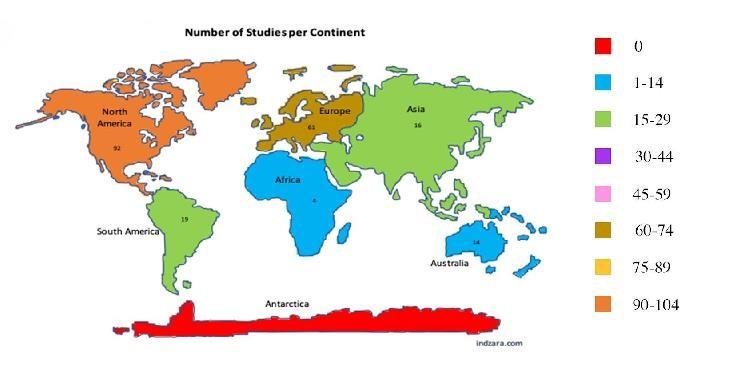


**Fig. S2.** Number of papers studied by continent. North America has the most studies followed by Europe, highlighting an inequity in the distribution of urban noise studies conducted in the Global North as compared to the Global South.

**Table S1.** Linear model results for the best-fitted model testing the effects of HOLC category and city population size on the mean noise exceedance metric N (dB/900m2).

CI

Predictors Estimates S.E.

lower upper


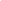


| Intercept | 2.23 | 0.08 | 2.08 | 2.38 |
| --- | --- | --- | --- | --- |
| HOLC-B | 0.36 | 0.10 | 0.15 | 0.56 |
| HOLC-C | 0.60 | 0.10 | 0.39 | 0.80 |
| HOLC-D | 0.79 | 0.10 | 0.59 | 1.00 |
| City population size | <0.01 | <0.01 | <0.01 | <0.01 |


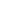


| Observations | 324 |
| --- | --- |
| R2 | 0.235 |
| AIC | 657.065 |

**Table S2.** List of U.S. cities included in the spatial analysis of the distribution of noise pollution across HOLC grades.

| **City** | **State** |  | **City (cont’d)** | **State (cont’d)** |
| --- | --- | --- | --- | --- |
| Akron | Ohio |  | Miami | Florida |
| Atlanta | Georgia |  | Milwaukee | Wisconsin |
| Augusta | Georgia |  | Nashville | Tennessee |
| Austin | Texas |  | New Haven | Connecticut |
| Baltimore | Maryland |  | New Orleans | Louisiana |
| Birmingham | Alabama |  | New York City | New York |
| Boston | Massachusetts |  | Newark area | New Jersey |
| Buffalo | New York |  | Norfolk | Virginia |
| Charleston | West Virginia |  | Oakland | California |
| Chattanooga | Tennessee |  | Oklahoma City | Oklahoma |
| Chicago | Illinois |  | Omaha | Nebraska |
| Cleveland | Ohio |  | Philadelphia | Pennsylvania |
| Columbia | South Carolina |  | Phoenix | Arizona |
| Columbus | Georgia |  | Pittsburgh | Pennsylvania |
| Columbus | Ohio |  | Portland | Oregon |
| Dallas | Texas |  | Providence | Rhode Island |
| Dallas/Ft. Worth | Texas |  | Pueblo | Colorado |
| Davenport | Iowa |  | Richmond | Virginia |
| Dayton | Ohio |  | Roanoke | Virginia |
| Denver | Colorado |  | Rochester | New York |
| Des Moines | Iowa |  | Sacramento | California |
| Detroit | Michigan |  | Salt Lake City | Utah |
| Dubuque | Iowa |  | San Antonio | Texas |
| Flint | Michigan |  | San Diego | California |
| Fort Worth | Texas |  | San Francisco | California |
| Fresno | California |  | San Jose | California |
| Grand Rapids | Michigan |  | Savannah | Georgia |
| Greater Kansas City Missouri | |  | Seattle | Washington |
| Hartford Connecticut | |  | Sioux City | Iowa |
| Houston Texas | |  | Spokane | Washington |
| Indianapolis Indiana | |  | St. Louis | Missouri |
| Jackson Mississippi | |  | St. Paul | Minnesota |
| Jacksonville Florida | |  | St. Petersburg | Florida |
| Knoxville Tennessee | |  | Stamford | Connecticut |
| Little Rock Arkansas | |  | Syracuse | New York |
| Los Angeles California | |  | Tacoma | Washington |
| Louisville Kentucky | |  | Tampa | Florida |
| Macon Georgia | |  | Toledo | Ohio |
| Madison Wisconsin | |  | Topeka | Kansas |
| Manchester New Hampshire | |  | Tulsa | Oklahoma |
| Memphis Tennessee | |  | Waterloo | Iowa |
|  | |  | Wichita | Kansas |

**Table S3.** Variables recorded from our literature review of empirical studies published between 1990 and our search date of June 23, 2021 that documented the effects of anthropogenic noise on wildlife in urban or suburban ecosystems or the effects of urban noise on wildlife in rural environments.

| Variable | Description |
| --- | --- |
| Study type | Natural experiment, playback, theoretical, combination |
| Location of Experiment | lab, field, both, or theoretical |
| Geographic region | The general geographic region in which the study took place: Africa, Antartica, Asia, Atlantic Ocean,  Australia, Baltic Sea, Europe, Global, Indian  Ocean, Mediterranean, North America, Pacific  Ocean, South America, |
| Biological response measured | The response of the study organism(s), specifically the response to anthropogenic noise: ecosystem, foraging behavior, life  history/reproduction, mating behavior, movement behavior, physiological, population, vigilance behavior, vocal behavior |
| Organism type | Birds, fish, herpetofauna, invertebrates, mammals, multiple |
| Trophic level | Carnivore, herbivore, omnivore, multiple |
| Habitat | Aquatic, terrestrial |
| Was the frequency of noise reported? | Whether the frequency range of the received noise was reported in the paper |
| Background (ambient) levels | The range or point estimate for background (ambient) noise level(s) if it was reported |
| Noise level that caused a response (record multiple noise levels if appropriate) | The noise level at which the study organism responded (measured biological response) to the sound/noise stimulus. Report associated unit (dB, Hz, etc.) |
| Specific biological response from the organism (report for each noise level) | How did the biological response change? E.g., Minimum frequency, number of songs, or duration of calls increased or decreased, species richness increased or decreased, etc. |
| Non-significant biological responses | List of any non-significant biological responses to noise described in the paper |
| Time period | When the study took place |
